# Supplementary material for: Effectiveness of government strategies for financial protection against costs of hospitalization Care in India
Source: BMC Public Health. 2018 Apr 16;18:501. doi: 10.1186/s12889-018-5431-8 (PMC5902925; doi:10.1186/s12889-018-5431-8)
Supplement: Supplementary file 1 — Different public funded health insurance (PFHI) programmes in India. This table shows the different PFHIs in India, including eligible beneficiaries, packages of services, sources of funding and covered population. This was obtained from different states’ websites and the World Bank Report, 2012. (XLSX 10 kb) [file 12889_2018_5431_MOESM1_ESM.xlsx]

## Sheet: Sheet1
Additional File 1: Different public funded health insurance (PFHI) programs in India
Type of Insurance schemes	Launch year and geographical areas	Target/eligible population	Number of beneficiaries	Benefit package	Source of funds	Maximum insurance coverage	Type of empaneled hospital
Employees State Insurance Scheme (ESIS)	1952, Pan India	Private formal Sector	82.8 million Beneficiaries (31st March 2016)1	Comprehensive	Contribution, percent of wages (employees 1.75%, employers 4.75%)	No limit	Both Public and private
Central Government Health Scheme (CGHS)	1954,Pan India	Employees and pensioners of central governments	3.6 million, Beneficiaries, 20151	Comprehensive	Central government budget, employee contribution based on salary	No limit	Both Public and private
Yeshasvini co-operative Farmers Healthcare scheme	2003, Entire state of Karnataka	Member of the rural cooperative societies (both above and below poverty line)	4.4 million, Beneficiaries, 2014-151	Inpatient, Surgical secondary focus, cover more than 1200 notified surgeries	Contributions, (beneficiaries 58%, state government 42%)	Rs 200,000 per person per year	Both Public and private
Rajiv Aarogyasri Community health insurance scheme	2007, Entire state of Andhra Pradesh	BPL families or annual income below Rs. 75,000	70 million, beneficiaries, 20102	Inpatient, tertiary focus, 938 identified procedures	State government (100% through health budget and through a levy on alcohol sales in state)	Rs. 1,50,000 per family per year plus buffer of Rs. 50,000 per year	Both Public and private
Rashtriya Swasthya Bima Yojana (RSBY)	2008, Pan India	BPL families and other targeted groups	38.5 million, families, 2014 1	Inpatient, secondary care focus, maternity also covered	Central government 60% state government 25%, but in some state this ratio varies	Rs. 30,000 per family (5 member) per year	Both Public and private
Chief minister comprehensive health insurance scheme	2009, Entire state of Tamil Nadu	BPL families, annual income below Rs. 72,000, members of 26 welfare boards	15.7 million families in 20171	Inpatient tertiary focus, more than 1016 procedures	State government 100%	Rs. 1,00,000 per year per family	Both Public and private
Vajpayee Arogyashri scheme	2009,Gulbarga divison of Karnataka	BPL residing in covered areas	3.1 million, families, 20101	Inpatient, tertiary focus, package of 402 procedures	State government 100%	Rs. 1,50,000 per family per year plus Rs. 50,000 per year buffer	Both Public and private
RSBY Plus	2010, Entire state of Himachal Pradesh	Enrollees in HP under RSBY	0.4 million, families, 20141	Inpatient, tertiary focus, package of 326 procedures	Sate government 100%	Rs.1,75.000, beyond the Rs. 30,000 covered by RSBY	Both Public and private
Aam Aadami Swasthya Bima Yojana	2011-12, Entire territory of Delhi	Enrollees in Delhi under RSBY	4 million families expected, 20161	Inpatient tertiary focus, defined procedures over and above RSBY	State government 100%	Rs. 1,50,000 per family per year	Both Public and private
Rajiv Gandhi Jeevandayee Arogya Yojana (RGJAY)	2012, Entire state of Maharashtra	BPL families and certain section of APL families	21.1 million families in 20131	Inpatient tertiary focus, packahe of 971 procedures	State government 100%	Rs. 1,50,000 per family (Rs. 2,50,000 only for renal transplant)	Both Public and private
Source: La Forgia G, Nagpal S. Government-sponsored health insurance in India: Are you covered? World Bank Publications; 2012[10] and websites of the respective schemes [6-8]
