# Supplementary material for: Effectiveness of government strategies for financial protection against costs of hospitalization Care in India
Source: BMC Public Health. 2018 Apr 16;18:501. doi: 10.1186/s12889-018-5431-8 (PMC5902925; doi:10.1186/s12889-018-5431-8)
Supplement: Supplementary file 3 — Average Out-of-pocket expenditure (OOPE) per hospitalization episode (the mean, in Rs.) across various socio-economic categories by type of insurance coverage. This table was calculated by the authors using the NSS 71st Round unit level data. This table shows OOPE across different equity indicators (sex, residence and social group). (XLSX 9 kb) [file 12889_2018_5431_MOESM3_ESM.xlsx]

## Sheet: Sheet1
Additional File 3: Average Out-of-pocket expenditure (OOPE) per hospitalization episode (mean, in Rs.) across various socio-economic categories by type of insurance coverage
Strata	Government funded (95%CI)	NOT Insured (95% CI)	ALL (95%CI)	N ( Episodes)
Total	10943 (10438.2-11446.8)	14436 (14082.8-14788.7)	13936 (13633.9-14238.1)	55026
Geographical location
Rural	10195 (9627.7-10762.5)	12092 (11679.1-12504.2)	11802 (11445.1-12158.1)	29844
Urban	12499 ( 11540.3-13458.5)	19612 (18962.1-20261.1)	18329 (17785.8-18872.9)	25182
Gender
Male	13522 (12544.3-14499.5)	20207 (19429.1-20985.4)	18843 (18196.3-19489.8)	20496
Female	9113 (8606.6-9618.8)	11497 (11156.6-11837.4)	11250 (10955.9-11545.5)	34530
Social groups
Schedule Tribes	5395 (3879.8-6909.8)	8567 (7861.4-9271.9)	7991 (7341.2-8641.0)	6145
Schedule castes	8189 (7370.9-9006.7)	9531 (9089.2-9972.9)	9350 (8958.1-9742.1)	9368
Other backward classes	11584 (10879.1-12288.0)	14574 (14022.4-15124.7)	14037 (13572.3-14502.6)	22053
Others	14494 (13175.5-15812.5)	18915 (18121.5-19707.7)	18359 (17671.1-19046.6)	17460
