# Supplementary material for: Effectiveness of government strategies for financial protection against costs of hospitalization Care in India
Source: BMC Public Health. 2018 Apr 16;18:501. doi: 10.1186/s12889-018-5431-8 (PMC5902925; doi:10.1186/s12889-018-5431-8)
Supplement: Supplementary file 7 — Hospitalization rate (per 100 population) under different insurance schemes for various socio- economic stratifiers. This table was calculated by the authors using the NSS 71st Round unit level data. This table shows the hospitalization rate in India across different equity indicators. (XLSX 10 kb) [file 12889_2018_5431_MOESM7_ESM.xlsx]

## Sheet: Sheet1
Additional File 7: Hospitalization rate (per 100 population) under different insurance schemes for various socio- economic Stratifiers
Strata	Government funded	Employer supported	Arranged by household	Not covered	Total	N ( Individuals)
Total	5.4	5.4	4.7	4.2	4.4	333104
Geographical location
Rural	5.1	4.6	5.1	4.1	4.3	189573
Urban	6.1	5.9	4.7	4.5	4.7	143531
Gender
Male	4.3	4.1	4.2	2.6	2.9	168697
Female	6.5	6.8	5.2	5.9	6	164407
Female ( Excluding childbirth)	4.1	4.1	3.7	3	3	164407
Social groups
Schedule Tribes	4.3	4.1	2.1	3.5	3.6	43142
Schedule castes	5.7	7.9	6.5	4.3	4.5	55454
Other backward classes	5.4	5.2	4.5	4.2	4.4	133565
Others	5.8	5.1	4.8	4.4	4.6	100943
UMPC quintile (rural)
Poorest	3.7	1.9	14.4	3.1	3.2	44499
Poor	4.6	6.3	3	3.6	3.7	35516
Middle	5.4	4.6	5.3	3.9	4.1	40335
Rich	4.5	3.3	6.6	4.8	4.8	35890
Richest	7.6	8.2	5	6	6.3	33333
UMPC quintile (urban)
Poorest	5	4.9	12.8	3.8	4	43372
Poor	6.6	4.9	7.5	4.6	4.8	34404
Middle	6.9	6	5.5	4.9	5.2	28834
Rich	5.7	7.1	4.2	4.4	4.6	20729
Richest	6.2	5.5	4.4	5.5	5.5	16192
